# Supplementary material for: Exploring the robust engineered ω-transaminase for manufacturing biobased amines from biomass-derived aldehydes
Source: Royal Society of Chemistry journal article supplement (doi:10.1039/d5gc05601b), 2026-01-01
Supplement: d5gc05601b1.pdf [file d5gc05601b1.pdf]

## Supporting Information

### **Exploring the robust engineered $\omega$ -transaminase for manufacturing biobased amines from biomass-derived aldehydes**

Qi Li<sup>a,b#</sup>, Junhua Di<sup>a#</sup>, Zhengyu Tang<sup>a#</sup>, Qing Li<sup>b</sup>, Zhiyi Lu<sup>a</sup>, Die Hu<sup>a</sup>, Yu-Cai He<sup>a,b\*</sup>  
and Cuiluan Ma<sup>b</sup>

<sup>a</sup> School of Pharmacy & School of Biological and Food Engineering, Changzhou University, Changzhou 213164, China

<sup>b</sup> State Key Laboratory of Biocatalysis and Enzyme Engineering, Hubei University, Wuhan 430062, China

\* Correspondence: heyucan2001@163.com, yucaihe@cczu.edu.cn (Y.H.)

# They contributed equally to this work.

## Supplementary Methods

### S1. Construction of *E. coli* AtTA and mutants

The gene encoding the  $\omega$ -transaminase AtTA from *Aspergillus terreus* was codon-optimized and synthesized. To construct the plasmid, primers pRSF-F and pRSF-R were used to linearize the pRSFDuet-1 backbone, while primers AT-F and AT-R amplified the AtTA gene (Table S3, see SI). pRSFDuet-AT plasmid was obtained by homologous recombination of amplified AtTA gene and linearized pRSFDuet-1 skeleton. The constructed plasmid (pRSFDuet-AT) was electroporated into competent *E. coli* BL21(DE3), generating a recombinant strain designated as *E. coli* AtTA. To introduce site-directed mutations, a pair of short primers containing specific mutation sites (Table S4, see SI) were designed. The resulting mutants included: T130M, T130F, E133F, D134L, T130ME133F, T130MD134L, I77L, Q97E, H210N, N245D, G292D, H210NI77L, H210NQ97E, H210NN245D, H210NG292D, H210NI77LQ97E, H210NI77LG292D, H210NI77LQ97EN245D, and H210NI77LQ97EN245DG292D.

### S2. Preparation of DES and synthesis of FAL and HMF

According to the predetermined molar ratio (Table S5, see SI), a precise amount of the hydrogen bond acceptor (HBA), such as betaine or choline chloride, and the hydrogen bond donor (HBD), including formic acid, lactic acid, urea, malic acid, malonic acid, glycerol, or ethylene glycol, was accurately weighed and added to a clean, dry 250 mL round-bottom flask. To initiate the synthesis, the flask was then placed on a magnetic stirrer with a heating function and maintained at a constant temperature of 80 °C while stirring at a speed of 260 rpm. Stirring continued until the solid components were completely dissolved, forming a homogeneous and transparent solution without any visible undissolved residues or precipitates, which indicated the successful formation of the deep eutectic solvent (DES). To ensure the stability of the system, the obtained DES solution was allowed to cool naturally to room temperature and subsequently transferred to a desiccator for further cooling, minimizing the influence of ambient humidity on its properties. Finally, the prepared DES was sealed and stored

in a dry, light-protected environment to prevent moisture absorption, oxidation, or degradation, thus ensuring its stability and suitability for subsequent experimental applications. FAL was synthesized by heating corncob (70 g/L) in a [ChCl][MA]-water mixture ([ChCl][MA] 30 vol%) at 160-180 °C for 10-30 minutes by autoclaving (400 rpm). Similarly, HMF was produced by heating bread crumbs (40 g/L) in the same [ChCl][MA]-water mixture under 170-190 °C for 15-90 minutes by autoclaving (400 rpm). Following the reactions, the mixtures were allowed to cool, then collected, diluted, and filtered prior to analysis by HPLC.

### **S3. Recycling and reuse of the DES system**

The recyclability of [ChCl][MA] used in the HNILQEND-catalyzed reaction was evaluated through consecutive reuse experiments under the same conditions as the standard biocatalytic reactions. The initial reaction was performed in the [ChCl][MA]-containing aqueous system with whole-cell biocatalysts of *E. coli* HNILQEND, substrate, and amine donor at the optimized temperature and pH. After completion of each reaction cycle, the whole-cell biocatalyst was removed by centrifugation at 8000 rpm for 10 min. The supernatant was then subjected to liquid-liquid extraction using ethyl acetate to remove the reaction products. Following phase separation, the organic phase was discarded, and the remaining [ChCl][MA]-containing aqueous phase was collected. Fresh substrate, amine donor, and whole-cell catalyst were added to the recycled DES phase, and the reaction was conducted under identical conditions. This recycling procedure was repeated for multiple consecutive cycles. The catalytic performance of the recycled DES system was evaluated in each cycle by measuring product yield after a fixed reaction time. The performance in the first cycle was defined as the reference, and the relative catalytic activity in subsequent cycles was compared accordingly.

### **S4. Analytical method**

An LC-2030C (3D) HPLC system (SHIMADZU Co., Japan) equipped with a Discovery C18 column (25 cm × 0.46 cm, 5 μm) was used for analysis. The mobile phase consisted of 20 vol % CH<sub>3</sub>OH, 80 vol % H<sub>2</sub>O containing 0.1 wt% TFA, delivered at a flow rate of 0.8 mL/min and maintained at 35 °C. FAL and HMF were monitored

at a detection wavelength of 254 nm, while FLA and HMFA were detected at 210 nm.

## Supplementary Tables

**Table S1.** Half-life and kinetic parameters of the  $\omega$ -transaminase *AtTA* and HNILQEND.

| $\omega$ -          | $t_{1/2}^{50^\circ\text{C}}$ , h | $t_{1/2}^{35^\circ\text{C}}$ , h | $K_m$ , mM | $V_{\text{max}}$ , mM/min | $K_{\text{cat}}$ , s <sup>-1</sup> |
|---------------------|----------------------------------|----------------------------------|------------|---------------------------|------------------------------------|
| <b>Transaminase</b> |                                  |                                  |            |                           |                                    |
| <i>AtTA</i>         | 0.41                             | 10.03                            | 95.01      | 0.62                      | 1.56                               |
| HNILQEND            | 2.38                             | 125.02                           | 50.37      | 0.72                      | 1.80                               |

**Table S2.** Data collection and refinement statistics for the crystal structure of HNILQEND.

| Parameters                                          | HNILQEND                 |
|-----------------------------------------------------|--------------------------|
| PDB ID                                              | 8XIY                     |
| <b>Data collection</b>                              |                          |
| SSRF beamline                                       | BL19U1                   |
| Wavelength (Å)                                      | 0.9786                   |
| Space group                                         | <i>C 2 2 21</i>          |
| Resolution (Å)                                      | 2.09 (41.88-2.09)        |
| <i>a, b, c</i> (Å)                                  | 106.42, 135.79, 116.93   |
| <i>α, β, γ</i> (degrees)                            | 90.00, 90.00, 90.00      |
| Subunits in asymmetric unit                         | 2                        |
| No. of unique reflections                           | 49080                    |
| Data completeness %                                 | 97.4 (48.11-2.09)        |
| $R_{merge}$                                         | 0.104                    |
| $R_{p.i.m.}$                                        | 0.034                    |
| Anisotropy                                          | 0.083                    |
| Average $I/\sigma(I)$                               | 2.37 (at 2.08 Å)         |
| <b>Refinement</b>                                   |                          |
| $R_{work}/R_{free}$ (%)                             | 17.1/21.6                |
| <i>B</i> from Wilson plot (Å <sup>2</sup> )         | 28.4                     |
| $R_{free}$ test set                                 | 2416 reflections (4.93%) |
| No. of protein atoms                                | 5530                     |
| No. of water atoms                                  | 497                      |
| No. of ligand atoms                                 | 47                       |
| Average <i>B</i> value, all atoms (Å <sup>2</sup> ) | 29.0                     |
| RMSD bond lengths (Å)                               | 0.42                     |
| RMSD bond angles (degrees)                          | 0.56                     |
| Ramachandran plot favored (%)                       | 98%                      |
| Ramachandran plot allowed (%)                       | 2%                       |
| Ramachandran plot outlier (%)                       | 0%                       |

**Table S3.** Strain, plasmids, and primer used in this study.

| <b>Strain, plasmid or primer</b>     | <b>Description or sequence (5'-3')</b>                   | <b>Source</b>             |
|--------------------------------------|----------------------------------------------------------|---------------------------|
| <b>Strain</b>                        |                                                          |                           |
| <i>Escherichia coli</i> DH5 $\alpha$ | gene cloning strain                                      | Novagen (Shanghai, China) |
| <i>Escherichia coli</i> BL21 (DE3)   | protein expression strain                                | Novagen (Shanghai, China) |
| <b>Plasmid</b>                       |                                                          |                           |
| pRSFDuet-1                           | Kan <sup>+</sup>                                         | Novagen (Germany)         |
| <b>Primer</b>                        |                                                          |                           |
| AT-F                                 | GCCATCACCATCATCACCACATGGCCA<br>GCATGGATAAAGTTTTTG        | Sangon (Shanghai, China)  |
| AT-R                                 | GCTCGAATTCGGATCCTGGCTTAATTG<br>CGTTCGTTATAATCGATCTCAAAGC |                           |
| pRSF-F                               | AGCCAGGATCCGAATTCGAGC                                    | Sangon (Shanghai, China)  |
| pRSF-R                               | GTGGTGATGATGGTGATGGCTGC                                  |                           |

**Table S4.** Primers containing mutation sites used in this study.

| <b>Mutation</b> | <b>Template</b>    | <b>Primers (5'-3')</b>                                                                                                           |
|-----------------|--------------------|----------------------------------------------------------------------------------------------------------------------------------|
| T130M           | pRSFDuet-AT        | Forward:<br>GTCTGAAAGGTGTTTCGTGGCATGCGTCCGGAAGAT<br>ATTGTTAA<br>Reverse:<br>CCGGTGTATACAGAACGCCATCTTTAACCAGAACA<br>ATGTTAAAACCGC |
| T130F           | pRSFDuet-AT        | Forward:<br>GTCTGAAAGGTGTTTCGTGGCTTCCGTCCGGAAGAT<br>ATTGTTAA<br>Reverse:<br>CCGGTGTATACAGAACGCCATCTTTAACCAGAACA<br>ATGTTAAAACCGC |
| E133F           | pRSFDuet-AT        | Forward:<br>CGTGGCACCGTCCGTTTCGATATTGTTAATAATC<br>Reverse:<br>CCGGTGTATACAGAACGCCATCTTTAACCAGAACA<br>ATGTTAAAACCGC               |
| D134L           | pRSFDuet-AT        | Forward:<br>CGTGGCACCCGTCCGGAATTAATTGTTAATAATCT<br>GTAT<br>Reverse:<br>CCGGTGTATACAGAACGCCATCTTTAACCAGAACA<br>ATGTTAAAACCGC      |
| T130M/E13<br>3F | pRSFDuet-<br>T130M | Forward:<br>CGTGGCATGCGTCCGTTTCGATATTGTTAATAATC<br>Reverse:<br>CCGGTGTATACAGAACGCCATCTTTAACCAGAACA<br>ATGTTAAAACCGC              |
| T130M/D13<br>4L | pRSFDuet-<br>T130M | Forward:<br>CGTGGCATGCGTCCGGAATTAATTGTTAATAATCT<br>GTAT<br>Reverse:<br>CCGGTGTATACAGAACGCCATCTTTAACCAGAACA<br>ATGTTAAAACCGC      |
| I77L            | pRSFDuet-AT        | Forward:                                                                                                                         |

---

|                 |                    |                                                                  |
|-----------------|--------------------|------------------------------------------------------------------|
|                 |                    | CTGGATGATCATTTAACCCGTCTGGAAGCAAGCTG<br>TACCAAACCTGC              |
|                 |                    | Reverse:<br>GTACGTGCAACAACCTGCGCTACCACCAACACGCT<br>G             |
| Q97E            | pRSFDuet-AT        | Forward:<br>GCCGCTGCCTCGTGATGAGGTAAACAAATTCTGG<br>TTGAAATGG      |
|                 |                    | Reverse:<br>CAGATCACCCCACTGCAGATTTTAAACGGTCGGAT<br>CAATTGCACC    |
| H210N           | pRSFDuet-AT        | Forward:<br>CTGACCGATGGTGATGCAAATCTGACCGAAGGTA<br>GCGG           |
|                 |                    | Reverse:<br>CCAATCTGACCACCATTAACCGGCATACCATCCAG<br>TGTGG         |
| N245D           | pRSFDuet-AT        | Forward:<br>CCCGTAAAAGCGTTATTGATGCAGCAGAAGCCTTT<br>GGTATTGAAGTG  |
|                 |                    | Reverse:<br>CCGAGCTCGAATTCGGATCCTGGCTTAATTGCGTT<br>CG            |
| G292D           | pRSFDuet-AT        | Forward:<br>GGATGGTATGCCGGTTAATGATGGTCAGATTGGTC<br>CGATCACC      |
|                 |                    | Reverse:<br>CTAAGATGGGGAATTGTTATCCGCTCACAATTCCC<br>CTATAGTGAGTCG |
| H210N/I77<br>L  | pRSFDuet-<br>H210N | Forward:<br>CTGGATGATCATTTAACCCGTCTGGAAGCAAGCTG<br>TACCAAACCTGC  |
|                 |                    | Reverse:<br>GTACGTGCAACAACCTGCGCTACCACCAACACGCT<br>G             |
| H210N/Q97<br>E  | pRSFDuet-<br>H210N | Forward:<br>GCCGCTGCCTCGTGATGAGGTAAACAAATTCTGG<br>TTGAAATGG      |
|                 |                    | Reverse:<br>CAGATCACCCCACTGCAGATTTTAAACGGTCGGAT<br>CAATTGCACC    |
| H210N/N24<br>5D | pRSFDuet-<br>H210N | Forward:<br>CCCGTAAAAGCGTTATTGATGCAGCAGAAGCCTTT<br>GGTATTGAAGTG  |

---

---

|                               |                                  |                                       |
|-------------------------------|----------------------------------|---------------------------------------|
|                               |                                  | Reverse:                              |
|                               |                                  | CCGAGCTCGAATTCGGATCCTGGCTTAATTGCGTT   |
|                               |                                  | CG                                    |
| H210N/G29<br>2D               | pRSFDuet-<br>H210N               | Forward:                              |
|                               |                                  | GGATGGTATGCCGGTTAATGATGGTCAGATTGGTC   |
|                               |                                  | CGATCACC                              |
|                               |                                  | Reverse: CTAAGATGGGGAATTGTTATCCGCTCAC |
| H210N/I77<br>L/Q97E           | pRSFDuet-<br>H210N/I77L          | Forward:                              |
|                               |                                  | GCCGCTGCCTCGTGATGAGGTTAAACAAATTCTGG   |
|                               |                                  | TTGAAATGG                             |
|                               |                                  | Reverse:                              |
|                               |                                  | CAGATCACCCCACTGCAGATTTTTTAACGGTCGGAT  |
|                               |                                  | CAATTGCACC                            |
| H210N/I77<br>L/G292D          | pRSFDuet-<br>H210N/I77L          | Forward:                              |
|                               |                                  | GGATGGTATGCCGGTTAATGATGGTCAGATTGGTC   |
|                               |                                  | CGATCACC                              |
|                               |                                  | Reverse:                              |
|                               |                                  | CTAAGATGGGGAATTGTTATCCGCTCACAATTCCC   |
|                               |                                  | CTATAGTGAGTCG                         |
|                               |                                  | Forward:                              |
|                               |                                  | CCCGTAAAAGCGTTATTGATGCAGCAGAAGCCTTT   |
|                               |                                  | GGTATTGAAGTG                          |
| H210N/I77<br>L/Q97E/N2<br>45D | pRSFDuet-<br>H210N/I77L/Q9<br>7E | Reverse:                              |
|                               |                                  | CCGAGCTCGAATTCGGATCCTGGCTTAATTGCGTT   |
|                               |                                  | CG                                    |
|                               |                                  | Forward:                              |
|                               |                                  | GGATGGTATGCCGGTTAATGATGGTCAGATTGGTC   |
|                               |                                  | CGATCACC                              |
|                               |                                  | Reverse:                              |
|                               |                                  | CTAAGATGGGGAATTGTTATCCGCTCACAATTCCC   |
|                               |                                  | CTATAGTGAGTCG                         |

---

**Table S5.** Synthesis of the deep eutectic solvents.

| DES          | HBA              | HBD             | Molar ratio |
|--------------|------------------|-----------------|-------------|
| [ChCl][FA]   | choline chloride | formic acid     | 1:1         |
| [ChCl][LA]   | choline chloride | lactic acid     | 1:1         |
| [ChCl][MAC]  | choline chloride | malic acid      | 1:1         |
| [ChCl][MA]   | choline chloride | malonic acid    | 1:1         |
| [ChCl][Urea] | choline chloride | urea            | 1:2         |
| [ChCl][Gly]  | choline chloride | glycerol        | 1:2         |
| [ChCl][EG]   | choline chloride | ethylene glycol | 1:2         |
| [BA][LA]     | betaine          | lactic acid     | 1:2         |
| [BA][MA]     | betaine          | malonic acid    | 1:2         |

## Supplementary Figures

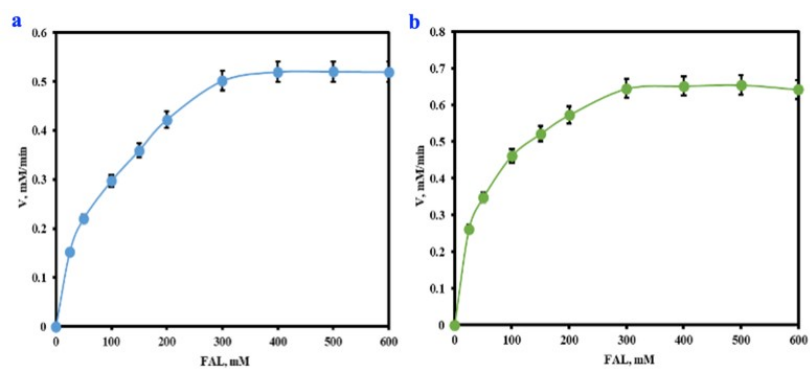

**Fig. S1** Michaelis-Menten fitting curves of the wild-type (a) and HN1LQEND (b).

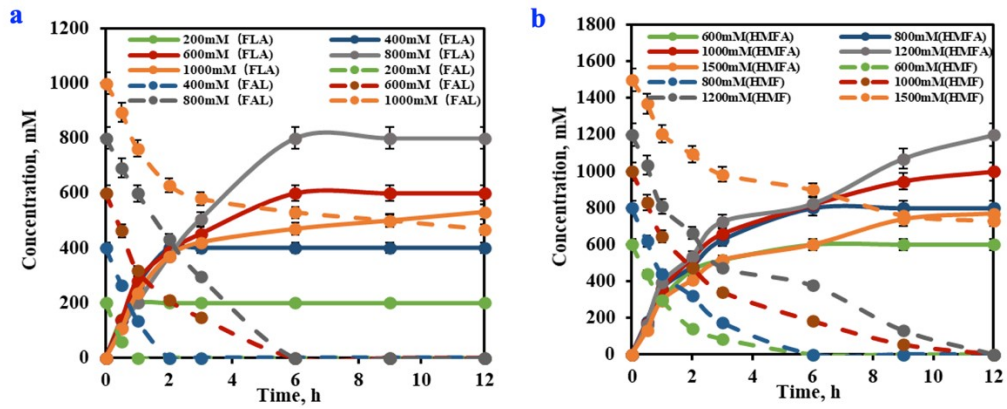

**Fig. S2** The substrate tolerance of HNILQEND towards varying concentrations of FAL (a) and HMF (b).

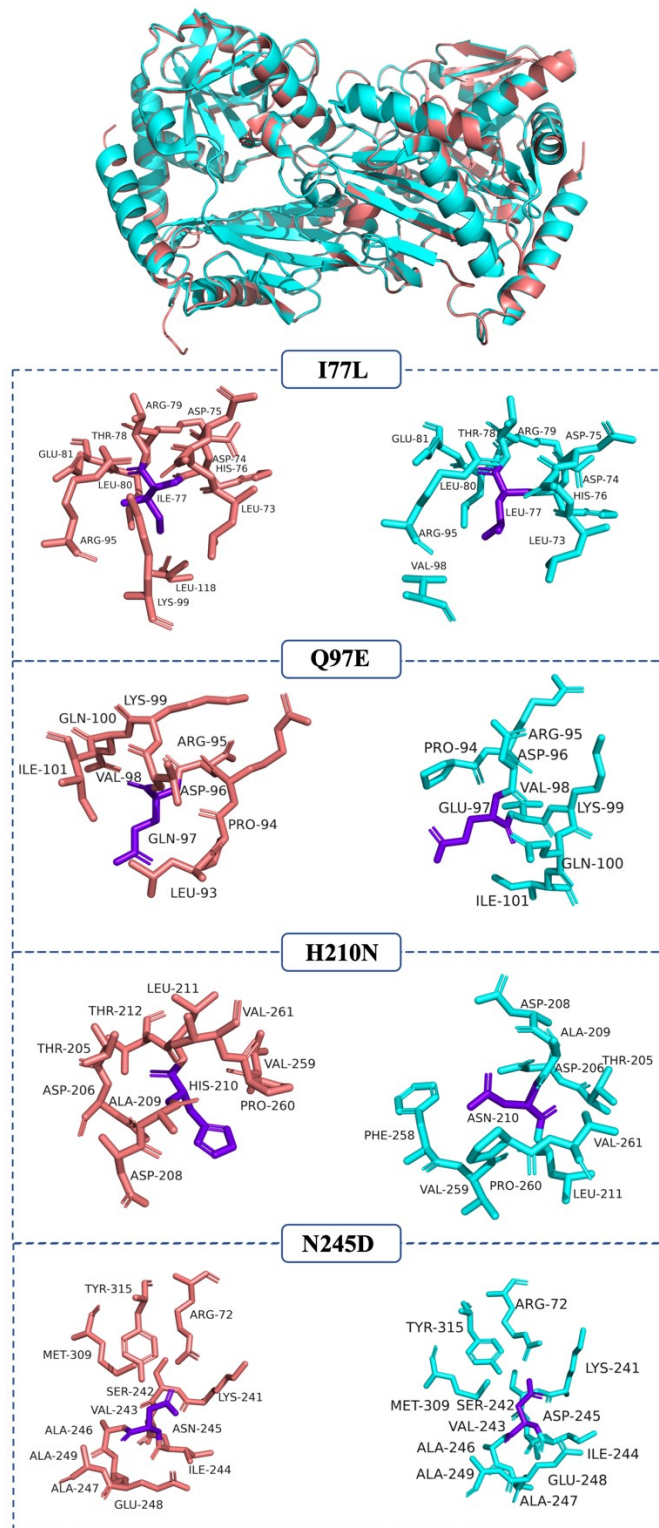

**Fig. S3** Structural comparison of local environments around the mutation sites within a 4 Å radius in the wild-type and HNILQEND [The wild-type enzyme is shown in red, whereas the HNILQEND mutant is shown in blue].

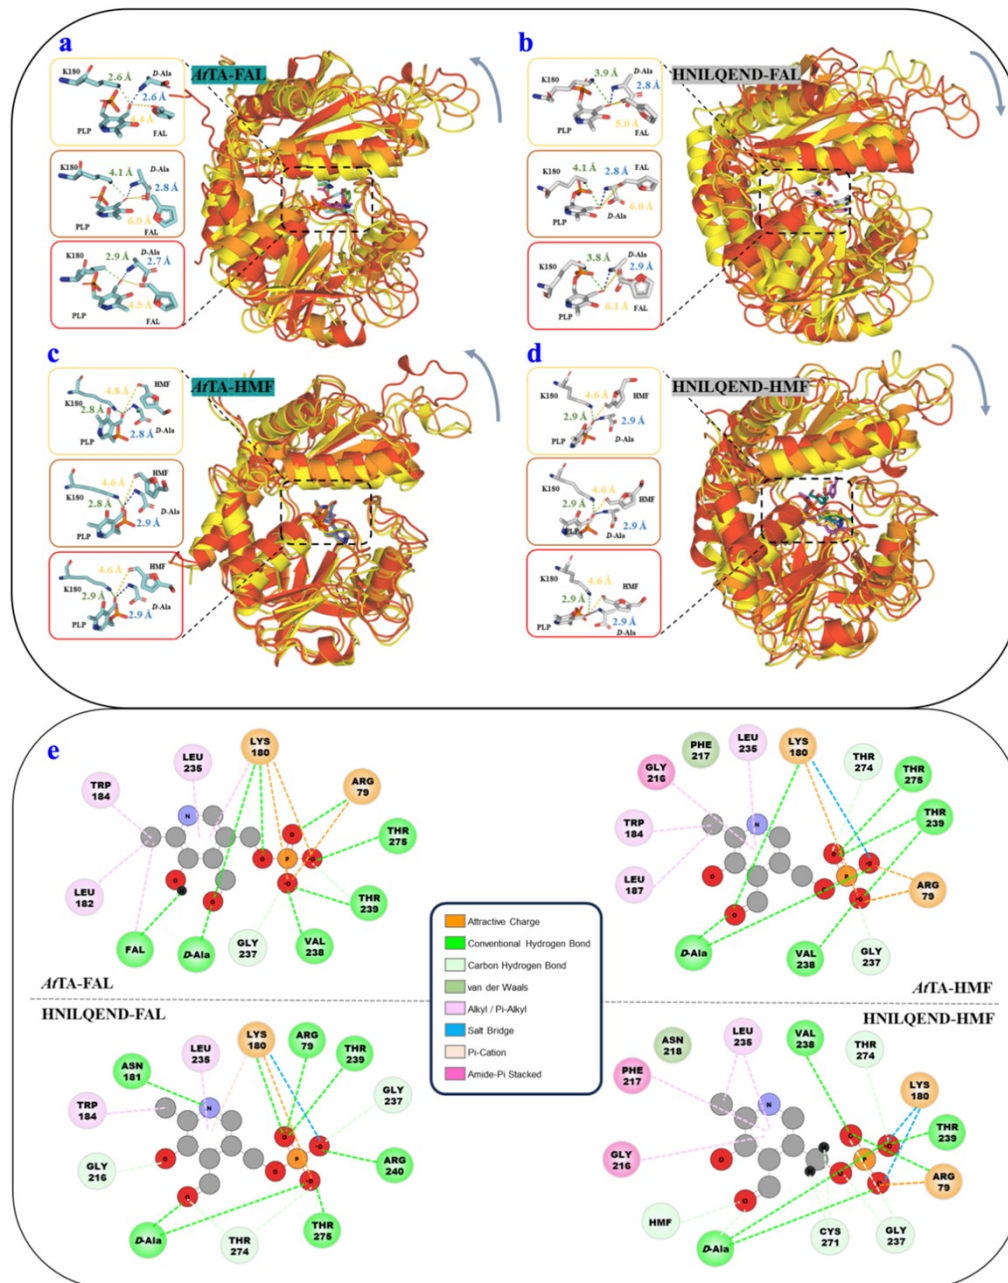

**Fig. S4** Conformational dynamics of substrate-gating loops and substrate-cofactor geometry: *AtTA*-FAL representative conformers with upward displacement of the substrate-gating loop (a), HNILQEND-FAL conformers showing downward displacement of the substrate-gating loop (b), *AtTA*-HMF conformers with retracted loop motion (c), HNILQEND-HMF conformers exhibiting repositioned loop orientation (d) [Insets: Catalytic pocket distances labeled for K180-PLP, *D*-Ala-PLP, and substrate-PLP in each cluster]; Non-bonded interaction networks in catalytic pockets (e).

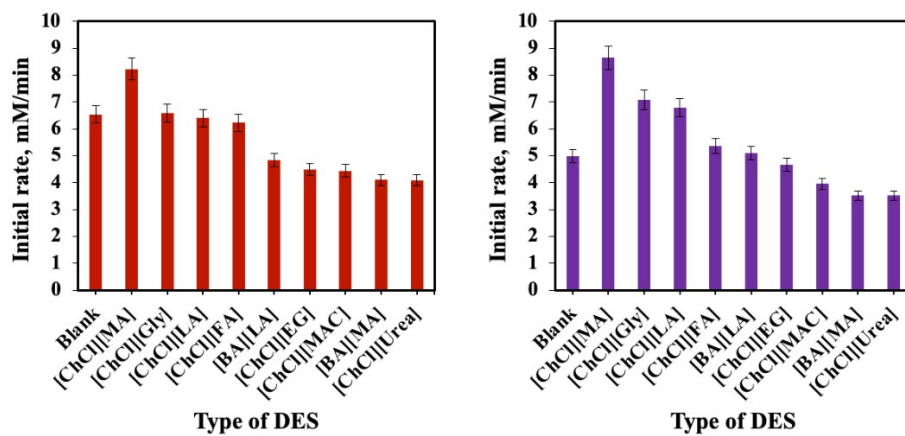

**Fig. S5** Effect of DES type on HNILQEND catalysis of FAL (a) and HMF (b).

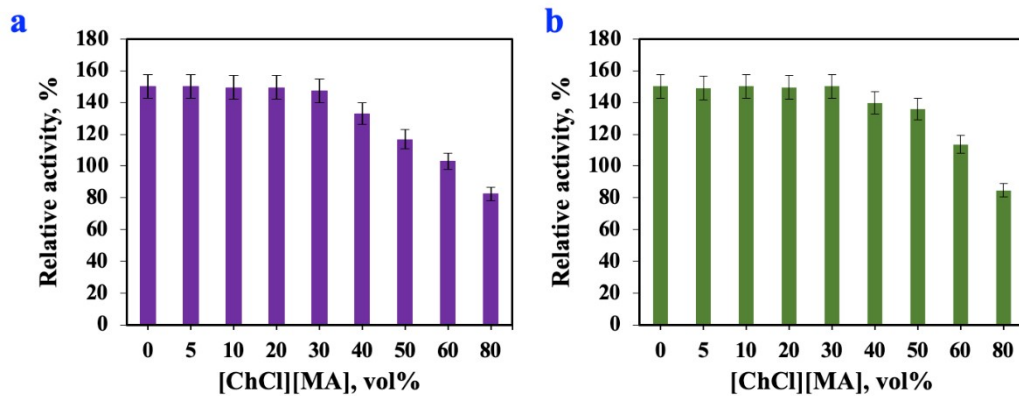

**Fig. S6** The effect of varying [ChCl][MA] content in the reaction solvent system on HNILQEND catalysis of FAL (a) and HMF (b).

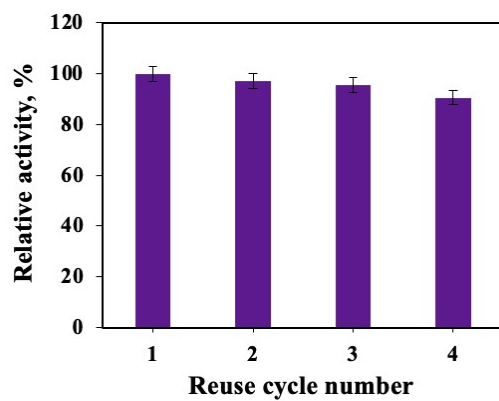

**Fig. S7** Reusability of [ChCl][MA] in the HNILQEND-catalyzed reaction.

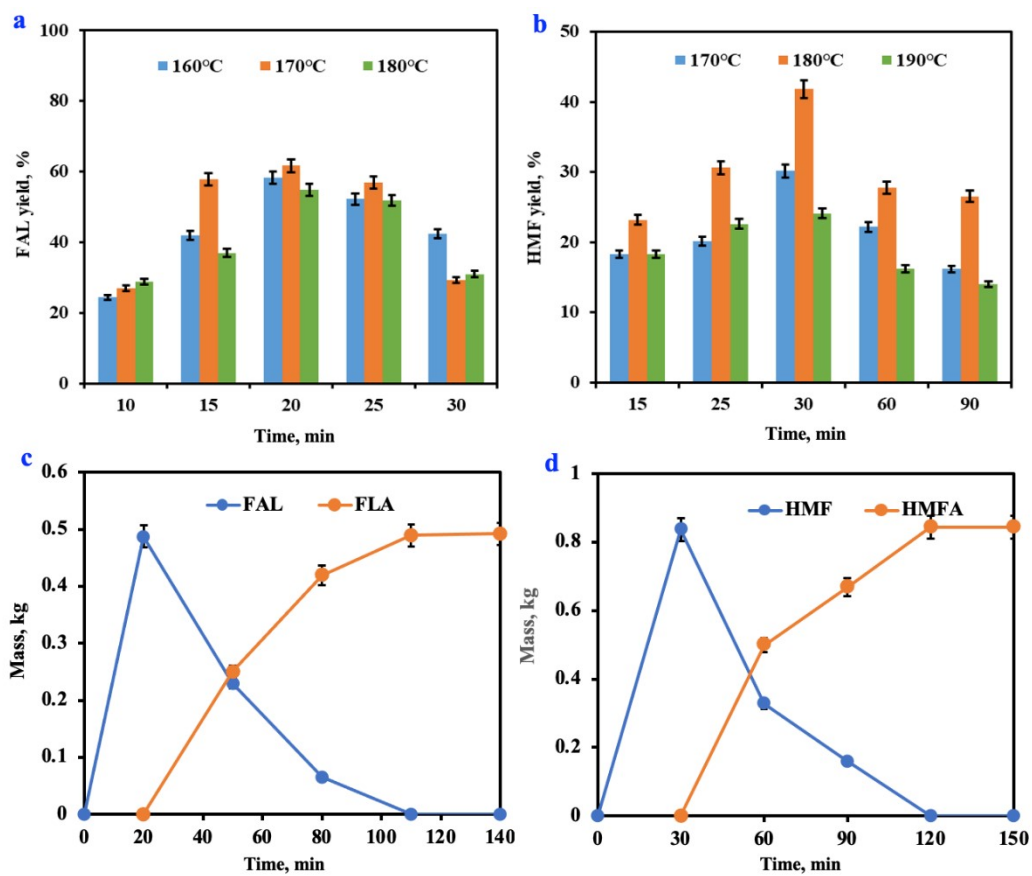

**Fig. S8** Effects of time and temperature for FAL generation (a) and HMF generation (b), time courses for a one-pot chemobiocatalytic synthesis of FLA and HMFA from corncob (c) and bread crumbs (d).

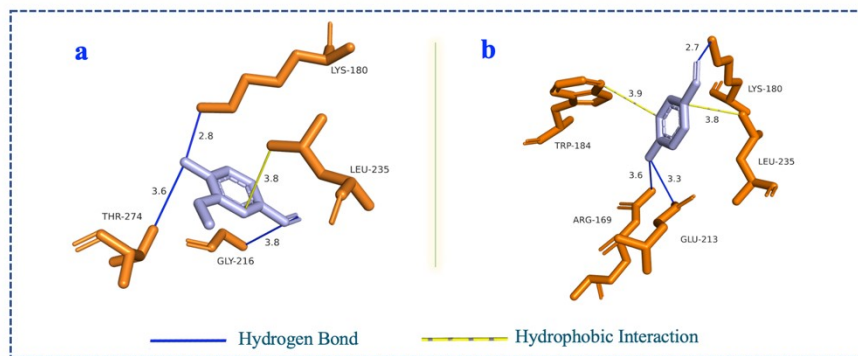

**Fig. S9** The interaction of ligand [vanillin (a) and 4-hydroxybenzaldehyde (b)] with crucial residues of HNILQEND.
